# Supplementary material for: Large-Scale Test Facility for Modeling Bubble Behavior and Liquid Metal Two-Phase Flows in a Steel Ladle
Source: Springer Nature journal article supplement (doi:10.1007/s11663-022-02481-x), 2022-03-18
Supplement: MOESM3 [file 20234564]

**Supplementary Material for:**  
**Large-scale test facility for modeling bubble behavior**  
**and liquid metal two-phase flows in a steel ladle**

Thomas Wondrak<sup>1</sup>, Klaus Timmel<sup>1</sup>, Christian Bruch<sup>2</sup>, Pascal Gardin<sup>3</sup>, Gernot Hackl<sup>4</sup>,  
Helmut Lachmund<sup>5</sup>, Hans Bodo Längen<sup>6</sup>, Hans-Jürgen Odenthal<sup>7</sup>, Sven Eckert<sup>1</sup>

<sup>1</sup> Helmholtz-Zentrum Dresden - Rossendorf, Bautzner Landstraße 400, 01328 Dresden, Germany

<sup>2</sup> Saarstahl AG, Bismarckstraße 57-59, 66333 Völklingen, Germany

<sup>3</sup> ArcelorMittal Global R&D Maizières, BP30320, 57283 Maizières-les-Metz Cedex, France

<sup>4</sup> RHI Magnesita GmbH, Magnesitstraße 2, A-8700 Leoben, Austria

<sup>5</sup> AG der Dillinger Hüttenwerke, Werkstraße 1, 66763 Dillingen/Saar, Germany

<sup>6</sup> Stahlinstitut VDEh, Sohnstraße 65, 40237 Düsseldorf, Germany

<sup>7</sup> SMS group GmbH, Eduard-Schloemann-Straße 4, 40237 Düsseldorf, Germany

Corresponding author: Thomas Wondrak, email: t.wondrak@hzdr.de

**Supplementary Movie S1**

The Supplementary Movie S1 shows the behavior of the free surface for a gas volume flow rate of 0.5 NL/min injected through the porous plug at the central position for ambient pressure (case D).

**Supplementary Movie S2**

The Supplementary Movie S2 shows the behavior of the free surface for a gas volume flow rate of 0.5 NL/min injected through the porous plug at the central position for low pressure conditions at 10 mbar (case D).
